# Supplementary material for: How to mitigate flood events similar to the 1979 catastrophic floods in lower Tagus
Source: Copernicus journal article supplement (doi:10.5194/nhess-2022-243), 2022-10-06
Supplement: Supplementary file 1 [file nhess-2022-243-supplement.pdf]

# Supplementary Material for

## How to mitigate flood events similar to the 1979 catastrophic floods in lower Tagus

Diego Fernández-Nóvoa<sup>1,2</sup>, Alexandre M. Ramos<sup>2</sup>, José González-Cao<sup>1</sup>, Orlando García-Feal<sup>1</sup>, Cristina Catita<sup>2</sup>, Moncho Gómez-Gesteira<sup>1</sup>, Ricardo M. Trigo<sup>2,3</sup>

<sup>1</sup>Centro de Investigación Mariña (CIM), Universidade de Vigo, Environmental Physics Laboratory (EPhysLab), Campus da Auga, 32004 Ourense, Spain

<sup>2</sup>Instituto Dom Luiz (IDL), Faculdade de Ciências da Universidade de Lisboa, 1749-016 Lisbon, Portugal

<sup>3</sup>Departamento de Meteorologia, Universidade Federal Do Rio de Janeiro, Rio de Janeiro, Brazil

### Accuracy of the Digital Elevation Models:

Spatial resolution and spatial accuracy are two of the most important issues in scientific disciplines that deal with geographical data, and therefore, need accurate cartographic results that fit the purposes of a particular study. In this sense, the quality of global DEMs has been frequently studied to assess their wide range of applications. Most of these studies consist of comparing the obtained data from DEMs and a set of reference data generally called control points. To evaluate DEM precision in the area under scope, 206 leveling benchmarks from the official high accuracy altimetric network of the Portuguese Geodetic System (RNGAP), located in the study area or in the immediate vicinity, were used as control points. This network is referred to the mean sea level in Cascais until the last day of 1938 (Cascais Helmert 38). In terms of accuracy, its relative error is rated at 0.1mm/100m (1ppm). Direção Geral do Território (DGT) provides, through a web feature service (WFS), all data related to the RNGAP (<http://mapas.dgterritorio.pt/geodesia/geodesiamarcasnivelamentowms.html>).

As it is shown in Table S1, where the main general characteristics of the freely available DEMs under consideration are presented, the horizontal and vertical references differ for some of them. To maintain the consistency of the different data, it was necessary to convert all data sets to the same reference frame to develop this analysis. Therefore, the WGS84 and the EGM96, were adopted as the horizontal and vertical reference systems, respectively. On the other hand, the altitudes of the leveling benchmarks are referred to the geoid model for Portugal mainland (GeodPT08) (<https://www.dgterritorio.gov.pt/geodesia/modelo-geoid>) (Catalao and Sevilla, 2009).

| <i>DEM</i>     | <i>CRS</i>   | <i>Elipsoid</i> | <i>Height datum</i> | <i>Spatial Resolution</i> | <i>Absolute Vertical Accuracy</i> | <i>Absolute Horizontal Accuracy</i> | <i>Reference</i>         |
|----------------|--------------|-----------------|---------------------|---------------------------|-----------------------------------|-------------------------------------|--------------------------|
| ESRI-DEM       | Cartographic | GRS80           | ETRS89              | 30 m                      | ± 20 m                            | < 30 m                              | ESRI Portugal (2009)     |
| ASTER GDEM     | Geographic   | WGS84           | EGM96               | 30 m                      | ± 20 m                            | < 30 m                              | ASTER (2009)             |
| SRTM DEM       | Geographic   | WGS84           | EGM96               | 30 m                      | ±16 m                             | < 20 m                              | Farr and Kobrick, (2000) |
| COP DEM GLO-30 | Geographic   | WGS84           | EGM2008             | 30 m                      | < 4 m                             | < 6 m                               | Fahrland et al., (2020)  |

**Table S1.** Original characteristics of the evaluated Digital Elevation Models.

Considering as altimetric error, the difference between the altitudes of each leveling benchmark and the pixel value, at the same location, in each DEM, the root mean square error (RMSE) (Eq. S1) for those differences was calculated (Table S2). The lower RMSE was obtained for the Copernicus DEM and as such, this was the altimetric model assumed as the most accurate on the study area.

| <i>DEM</i> | <i>ESRI</i> | <i>ASTER</i> | <i>SRTM</i> | <i>Copernicus</i> |
|------------|-------------|--------------|-------------|-------------------|
| RMSE (m)   | 4.81        | 5.91         | 4.42        | 3.81              |

**Table S2.** Statistical analysis of the altitude difference between leveling benchmarks and analyzed DEMs.

**Equations:**

$$RMSE = \sqrt{\frac{\sum_{i=1}^N (S_i - O_i)^2}{N}} \quad (S1)$$

where  $S$  is the DEM value,  $O$  is the official altimetric value, subscript  $i$  refers to the different points under consideration and  $N$  is the total number of data.

**References:**

- ASTER, G.V.T.: ASTER global DEM validation Summary report. METI/ERSDAC, NASA/LPDAAC, USGS/EROS, 2009.
- Catalao, J., and Sevilla, M. J.: Mapping the geoid for Iberia and the Macaronesian Islands using multi-sensor gravity data and the GRACE geopotential model, *J. Geodym.*, 48(1), 6-15, <https://doi.org/10.1016/j.jog.2009.03.001>, 2009.
- ESRI-Portugal.: <https://www.arcgis.com/home/search.html?t=content&q=owner%3AESRI-PT>, 2009.
- Fahrland, E., Jacob, P., Schrader, H., and Kahabka, H.: Copernicus Digital Elevation Model—Product Handbook. Airbus Defence and Space—Intelligence: Potsdam, Germany, 2020.
- Farr, T.G., and Kobrick, M.: Shuttle Radar Topography Mission produces a wealth of data. *Eos, Transactions American Geophysical Union*, 81(48), 583-585, <https://doi.org/10.1029/EO081i048p00583>, 2000.
