# Supplementary material for: How to mitigate flood events similar to the 1979 catastrophic floods in lower Tagus
Source: Copernicus journal article supplement (doi:10.5194/nhess-2022-243), 2022-10-06
Supplement: Supplementary file [file nhess-2022-243-RC2-supplement.pdf]

**nhess-2022-243**

**Title: How to mitigate flood events similar to the 1979 catastrophic floods in lower Tagus**

**Reviewer Comments:**

1. The novelty part of the MS is missing in the MS. Please mention.
2. The authors have mentioned the 2D hydrodynamic model (Iber+ numerical model). Is this model is open source? Please specify.
3. Please mention the comparative analysis of simulated model with Iber+ numerical model to check the accuracy of model.
4. The statistical analysis is missing in the MS.
5. Please do the sensitivity analysis of the model.
6. Kindly, separate the discussion section and mention the limitation and recommendation of the study.
